# Supplementary material for: Safety-oriented Practices of Adult Bicycle Ridersin Brooklyn, New York USA: An Interview Study
Source: Preprints.org preprint supplement (doi:10.20944/preprints202002.0159.v1), 2020-02-12
Supplement: Supplementary file 1 [file S47 Participant Chart & Recruitment Log.xlsx]

## Sheet: Participant Chart
Participant Number	Recruitment Date	Interview Date	Recruitment Location	Recording File Name	Age	Age bands	Gender	Race or Ethnicity	Education	Total Years Since Learning to Ride Bike	Years Since Learning to Bike (Bands)	Years Biking in Brooklyn	Years Biking in Brooklyn (Bands)	Hours / Week	Hours / Week (Bands)	Rank order hr/wk	Crashes Y/N	More careful or less?
1	2018-07-07	2018-07-23	Bay Ridge	TO109E01.mp3	39	35-39	M	White	Bachelor degree	29	20-29	11	11 - 15	4 - 8	4 - 8	c	0	M
2	2018-07-14	2018-07-26	Park Slope	TO111E01.mp3	34	30-34	F	White	Associate degree			5	3 - 5	1 - 2	2 or less	a	0	M
3	2018-07-28	2018-07-30	Sheepshead Bay	TO116E01.mp3	53	50-54	M	White	Some college	20	20-29	c20	20 or more	6 - 8	4 - 8	c	0	M
4	2018-07-28	2018-07-30	Sheepshead Bay	TO116E02.mp3	30	30-34	M	White	Master degree	1	1	1	2 or less	1.5 - 2.5	2 or less	a	0	S
5	2018-08-04	2018-08-06	Bay Ridge	TO101E05.mp3	47	45-49	M	White-It. Am.	Some college	30+	30-39	30+	20 or more	10	10 or more	d	1	M
6	2018-09-02	2018-09-04	Park Slope	TO101E01.mp3	75	Over 60	F	White-Jewish	Doctorate	20	20-29	10	6 - 10	3 - 4	2 - 4	b	0	M
7	2018-09-02	2018-09-08	Park Slope	TO104E03.mp3	52	50-54	M	White	Bachelor degree	46	40 or more	c12	11 - 15	3 - 4	2 - 4	b	0	M
8	2018-09-16	2018-09-17	Williamsburg	TO101E03.mp3	39	35-39	F	White	Bachelor degree	c31	30-39	3	3 - 5	3.75	2 - 4	b	1	M
9	2018-09-16	2018-09-17	Williamsburg	TO101E06.mp3	34	30-34	M	White	Bachelor degree	28	20-29	8	6 - 10	7	4 - 8	c	1	M
10	2018-09-15	2018-09-17	Sunset Park	TO102E01.mp3	28	25-29	F	White	Master degree	23?	20-29	6	6 - 10	0.7 - 1	2 or less	a	1	S
11	2013-09-23	2018-09-24	Prospect Heights	TO108E01.mp3	26	25-29	F	Armenian	Master degree	2	2	1	2 or less	2 - 3	2 - 4	b	1	M
12	2013-09-23	2018-09-24	Prospect Heights	TO108E02.mp3	25	25-29	M	Middle Eastern	Master degree	13	10-15	2	2 or less	4	2 - 4	b	1	M
13	2013-09-29	2018-09-30	Midwood	TO114E01.mp3	50	50-54	M	White	Post-graduate cert.	c45	40 or more	14	11 - 15	14 - 28	10 or more	d	1	?
14	2013-09-29	2018-10-01	Midwood	TO115E02.mp3	64	Over 60	M	Polish	Bachelor degree	32	30-39	c32	20 or more	4.7	4 - 8	c	1	S
15	2018-10-04	2018-10-05	Crown Heights	TO119E01.mp3	36	35-39	M	White	Associate degree	28	20-29	12	11 - 15	4	2 - 4	b	1	S
16	2018-10-07	2018-10-08	Bushwick	TO122E01.mp3	34	30-34	F	African-American	Bachelor degree	20+	20-29	0.33	2 or less	3.35 - 7	4 - 8	c	1	M
17	2018-10-07	2018-10-08	Bushwick	TO122E03.mp3	29	25-29	F	Filipino	Bachelor degree	27	20-29	7 to 8	6 - 10	1.5 - 2	2 or less	a	1	M
18	2018-10-07	2018-10-09	Bushwick	TO123E01.mp3	50	50-54	M	White	Master degree	44	40 or more	22	20 or more	14	10 or more	d	1	M
19	2018-10-06	2018-10-09	Downtown	TO124E02.mp3	47	45-49	M	White	Post-graduate cert.	42	40 or more	15	11 - 15	7	4 - 8	c	1	M
20	2018-10-28	2018-11-02	Sunset Park	TO216E01.mp3	37	35-39	M	Hispanic	Some college	20+	20-29	4*	3 - 5	8	4 - 8	c	1	M
21	2018-10-28	2018-11-03	Sunset Park	TO217E01.mp3	28	25-29	M	White	Bachelor degree	20+	20-29	5	3 - 5	6 - 8	4 - 8	c	1	S
22	2018-11-04	2018-11-05	Prospect Heights	TO219E01.mp3	37	35-39	F	African-American	Master degree	30	30-39	c5	3 - 5	6	4 - 8	c	0	S
23	2018-11-04	2018-11-09	Prospect Heights	TO223E01.mp3	35	35-39	F	White	Master degree	c30	30-39	1.5	2 or less	2 - 2.67	2 - 4	b	0	S
24	2018-11-18	2018-11-18	Downtown	T0101E02.mp3	64	Over 60	F	Multiple ethnicities	Master degree	60	40 or more	40	20 or more	10	10 or more	d	1	M

## Sheet: Recruitment Log
Recruit #	Date of Recruitment	Date of Interview	Recruitment Location	Gender	Interviewed?	Participant #
1	2018-07-07		Bay Ridge	F	No
2	2018-07-07	2018-07-23	Bay Ridge	M	Yes	1
3	2018-07-07		Bay Ridge	M	No
4	2018-07-14	2018-07-26	Park Slope	F	Yes	2
5	2018-07-14		Park Slope	F	No
6	2018-07-14		Park Slope	F	No
7	2018-07-28	2018-07-30	Sheepshead Bay	M	Yes	3
8	2018-07-28	2018-07-30	Sheepshead Bay	M	Yes	4
9	2018-07-28		Sheepshead Bay	M	No
10	2018-07-28		Sheepshead Bay	M	No
11	2018-08-04	2018-08-06	Bay Ridge	M	Yes	5
12	2018-08-04		Bay Ridge	M	No
13	2018-08-18		Clinton Hill	F	No
14	2018-08-18		Clinton Hill	M	No
15	2018-08-18		Crown Heights	M	No
16	2018-08-18		Crown Heights	M	No
17	2018-08-18		Crown Heights	M	No
18	2018-08-26		Crown Heights	F	No
19	2018-08-26		Crown Heights	M	No
20	2018-09-02	2018-09-04	Park Slope	F	Yes	6
21	2018-09-02		Park Slope	F	No
22	2018-09-02		Park Slope	F	No
23	2018-09-02	2018-09-08	Park Slope	M	Yes	7
24	2018-09-04		Sunset Park	M	No
25	2018-09-15	2018-09-17	Sunset Park	F	Yes	10
26	2018-09-15		Sunset Park	M	No
27	2018-09-15		Sunset Park	M	No
28	2018-09-15		Sunset Park	M	No
29	2018-09-16	2018-09-17	Williamsburg	F	Yes	8
30	2018-09-16		Williamsburg	F	No
31	2018-09-16	2018-09-17	Williamsburg	M	Yes	9
32	2018-09-16		Williamsburg	M	No
33	2018-09-16		Williamsburg	M	No
34	2018-09-16		Williamsburg	M	No
35	2018-09-16		Williamsburg	M	No
36	2018-09-23		Crown Heights	F	No
37	2018-09-23	2018-09-24	Prospect Heights	F	Yes	11
38	2018-09-23		Prospect Heights	F	No
39	2018-09-23	2018-09-24	Prospect Heights	M	Yes	12
40	2018-09-23		Prospect Heights	M	No
41	2018-09-29	2018-09-30	Midwood/Marine Park	M	Yes	13
42	2018-09-29	2018-10-01	Midwood/Marine Park	M	Yes	14
43	2018-09-29		Midwood/Marine Park	M	No
44	2018-09-29		Midwood/Marine Park	M	No
45	2018-09-29		Midwood/Marine Park	M	No
46	2018-09-29		Midwood/Marine Park	M	No
47	2018-09-29		Midwood/Marine Park	M	No
48	2018-09-30		Bedford/Stuyvesant	M	No
49	2018-09-30		Bedford/Stuyvesant	M	No
50	2018-09-30		Bedford/Stuyvesant	M	No
51	2018-09-30		Bedford/Stuyvesant	M	No
52	2018-09-30		Bedford/Stuyvesant	M	No
53	2018-09-30		Bedford/Stuyvesant	M	No
54	2018-09-30		Bedford/Stuyvesant	M	No
55	2018-10-04		Crown Heights	F	No
56	2018-10-04		Bedford/Stuyvesant	M	No
57	2018-10-04		Bedford/Stuyvesant	M	No
58	2018-10-04	2018-10-05	Crown Heights	M	Yes	15
59	2018-10-05		Sunset Park	F	No
60	2018-10-05		Sunset Park	M	No
61	2018-10-06		Downtown Brooklyn	F	No
62	2018-10-06		Downtown Brooklyn	F	No
63	2018-10-06	2018-10-09	Downtown Brooklyn (Atlantic Av)	M	Yes	19
64	2018-10-06		Red Hook	M	No
65	2018-10-07	2018-10-08	Bushwick	F	Yes	16
66	2018-10-07	2018-10-08	Bushwick	F	Yes	17
67	2018-10-07		Bushwick	F	No
68	2018-10-07		Bushwick	F	No
69	2018-10-07		Bushwick	F	No
70	2018-10-07	2018-10-09	Bushwick	M	Yes	18
71	2018-10-07		Bushwick	M	No
72	2018-10-07		Bushwick	M	No
73	2018-10-07		Bushwick	M	No
74	2018-10-07		Bushwick	M	No
75	2018-10-20		Bedford/Stuyvesant	F	No
76	2018-10-20		Bedford/Stuyvesant	M	No
77	2018-10-20		Bedford/Stuyvesant	M	No
78	2018-10-20		Bedford/Stuyvesant	M	No
79	2018-10-20		Bedford/Stuyvesant	M	No
80	2018-10-20		Bedford/Stuyvesant	M	No
81	2018-10-28	2018-11-02	Sunset Park	M	Yes	20
82	2018-10-28	2018-11-03	Sunset Park	M	Yes	21
83	2018-10-28		Sunset Park*	M	No
84	2018-11-04	2018-11-05	Prospect Heights	F	Yes	22
85	2018-11-04	2018-11-09	Prospect Heights	F	Yes	23
86	2018-11-04		Bedford/Stuyvesant	M	No
87	2018-11-04		Bedford/Stuyvesant	M	No
88	2018-11-04		Bedford/Stuyvesant	M	No
89	2018-11-04		Bedford/Stuyvesant	M	No
90	2018-11-18	2018-11-18	Downtown Brooklyn (Borough Hall)	F	Yes	24
91	2018-11-18		Downtown Brooklyn	F	No
			Recruitment Location	Total Recruited	Total Interviewed?	% interviewed	Women recruited	Women interviewed	% interviewed	Men recruited	Men interviewed	% interviewed
	1		Bay Ridge	5	2	0.4	1	0	0	4	2	0.5
	1		Bedford/Stuyvesant	19	0	0	1	0	0	18	0	0
	1		Bushwick	10	3	0.3	5	2	0.4	5	1	0.2
	1		Clinton Hill	2	0	0	1	0	0	1	0	0
	1		Crown Heights	8	1	0.125	3	0	0	5	1	0.2
	1		Downtown Brooklyn	5	2	0.4	4	1	0.25	1	1	1
	1		Midwood/Marine Park	7	2	0.285714	0	0	n.a.	7	2	0.285714
	1		Park Slope	7	3	0.428571	6	2	0.333333	1	1	1
	1		Prospect Heights	6	4	0.666667	4	3	0.75	2	1	0.5
	1		Red Hook	1	0	0	0	0	n.a.	1	0	0
	1		Sheepshead Bay	4	2	0.5	0	0	n.a.	4	2	0.5
	1		Sunset Park	10	3	0.3	2	1	0.5	8	2	0.25
	1		Williamsburg	7	2	0.285714	2	1	0.5	5	1	0.2
	13			91	24	0.263736	29	10	0.344828	62	14	0.225806
Recruit #	Date of Recruitment	Date of Interview	Recruitment Location	Gender	Interviewed?	Case #
2	2018-07-07	2018-07-23	Bay Ridge	M	Yes	1
4	2018-07-14	2018-07-26	Park Slope	F	Yes	2
7	2018-07-28	2018-07-30	Sheepshead Bay	M	Yes	3
8	2018-07-28	2018-07-30	Sheepshead Bay	M	Yes	4
11	2018-08-04	2018-08-06	Bay Ridge	M	Yes	5
20	2018-09-02	2018-09-04	Park Slope	F	Yes	6
23	2018-09-02	2018-09-08	Park Slope	M	Yes	7
29	2018-09-16	2018-09-17	Williamsburg	F	Yes	8
31	2018-09-16	2018-09-17	Williamsburg	M	Yes	9
25	2018-09-15	2018-09-17	Sunset Park	F	Yes	10
37	2018-09-23	2018-09-24	Prospect Heights	F	Yes	11
39	2018-09-23	2018-09-24	Prospect Heights	M	Yes	12
41	2018-09-29	2018-09-30	Midwood/Marine Park	M	Yes	13
42	2018-09-29	2018-10-01	Midwood/Marine Park	M	Yes	14
58	2018-10-04	2018-10-05	Crown Heights	M	Yes	15
65	2018-10-07	2018-10-08	Bushwick	F	Yes	16
66	2018-10-07	2018-10-08	Bushwick	F	Yes	17
70	2018-10-07	2018-10-09	Bushwick	M	Yes	18
63	2018-10-06	2018-10-09	Downtown Brooklyn (Atlantic Av)	M	Yes	19
81	2018-10-28	2018-11-02	Sunset Park	M	Yes	20
82	2018-10-28	2018-11-03	Sunset Park	M	Yes	21
84	2018-11-04	2018-11-05	Prospect Heights	F	Yes	22
85	2018-11-04	2018-11-09	Prospect Heights	F	Yes	23
90	2018-11-18	2018-11-18	Downtown Brooklyn (Borough Hall)	F	Yes	24
