# Supplementary material for: Safety-oriented Practices of Adult Bicycle Ridersin Brooklyn, New York USA: An Interview Study
Source: Preprints.org preprint supplement (doi:10.20944/preprints202002.0159.v1), 2020-02-12
Supplement: Supplementary file 3 [file S38 Hazard Parked cars Dooring.docx]

| **Theme: Hazard: Being doored. *[It happened to me. (5)]* [It happened to someone I know. (3)]** | **Respondents** |
| --- | --- |
| **20 (12M, 8F)** |
| **Responses:**  F [What are the most common dangers or hazards that confront a bicycle rider?] I would say, doors opening - you know, for cars that are parked on the curbside and you're (unintelligible) them in lane. (#10)  F Watch out for parked cars, who might open their doors on you. (#11)  M People opening doors without looking. (#4)  M I have been in situations where people would open up the doors and almost strike me, while I'm on a bike lane. (#13)  *M Well, I didn't tell you about the opening door, right? I mean, like - Twice, opened door on me, but not serious. (#14)*  M Watch out for doors opening. Pay attention for people inside of cars, and always just try to be ready for it and keep a slight distance so you can make a last-second (unintelligible word) or movement if needed. (#15)  *F I've been doored once I think it was, like, last year by a passenger who wouldn't - just, like, wasn't looking. But I feel like I was probably I didn't realize, like, how close I was to the side. (#17)*  *M For a bicycle rider in Brooklyn, what are the most common dangers or hazards that confront a bicycle rider? Okay doors, getting doored even if you use the bike lane. I've been doored a couple of times, I guess. (#18)*  M I think the one that worries me the most is the doors if they do open I've been fortunate, I've not hit a door. My wife was hit only last week a taxi door opened. (#19)  F If I'm on a street that doesn't have a bike lane, I usually stay about a meter away from the cars that are parked, so that if there is anyone, like, coming out of a car or coming in between cars, I'm not, like - I have some room to do something or to see them, I have an extra second or whatever to see them come out or open the door. (#2)  M Cars are the biggest danger - cars not paying attention when turning, or passengers of cars exiting without looking at their surroundings. (#21)  F And, usually the bike lanes are not protected, so there's always a chance that, you know, car doors can open into it. (#23)  *F I got doored in March of 2014 and was seriously injured. Several operations, 2 ½ years of physical therapy, and permanent stuff that will probably result in needing another surgery at some point. Not fun. And I set off metal detectors. (#24)*  M People - Mostly, when people park, or getting in and out of cars, you know, they swing the door open. You know, I myself, I drive an automobile also, and I'm more conscious, I look through my rearview mirror before opening up the door people still don't do that. (#3)  M Parked cars yeah - You just got to watch the doors when they open them. So - other than that, no issues with parked cars. (#5)  F My main concern is being doored - because a number of my friends have been. (#6)  M People opening doors is a big one, of course, that you have to watch out for. (#7)  F They should be more aware of what - how they open the door when by the biking lane, but they just don't pay attention. A lot of accidents happens when they open the door right on the biker. (#8)  *M Yeah, I've been doored a number of times, and - but not for several years, but I definitely had some period of dooring. (#9)*  M One danger I didn't mention before is car doors opening - yeah, my brother, who also rides his bike, he got hit by a car door. People don't normally look out of their sideview mirror before they swing the door open and that's a dangerous thing, so I try not to get too close to the parked cars. (#20) | |
