# Supplementary material for: Safety-oriented Practices of Adult Bicycle Ridersin Brooklyn, New York USA: An Interview Study
Source: Preprints.org preprint supplement (doi:10.20944/preprints202002.0159.v1), 2020-02-12
Supplement: Supplementary file 5 [file S39 Hazard Turning vehicles.docx]

| **Theme: Hazard: Turning vehicles. *[Crash experiences involving self (6)]*  [Crash experiences involving other (1)]** | **Respondents** |
| --- | --- |
| **15 (9M, 6F)** |
| **Responses:**  *M Another crash, it was, like, three years ago, somebody made a right turn on me it was my fault, you know, because I shouldn't be there, I shouldn't be there, and that - my fault was that this woman didn't signal that she was making a right, and it was at the intersection and I hoped I would pass her on the right, but she was turning right, you know, so she hit me..... And I had another one ….. I was going straight and it was, like, a little rain and somebody was trying to make, again, at the intersection, somebody was trying to make a left turn this time on me….*  I saw one guy get killed, you know. At Fort Hamilton and, like, 60th Street. And I saw him lying, I saw police, I asked what happened, and they told me that probably he will not survive. And he was going straight and somebody make a right turn on him. And this guy that made the right turn was going quickly also, because he hit him. (#14)  *M I've been hit by a car pretty bad, not in New York. It was somewhere else I was going straight and somebody turned left into me. (#15)*  F Drivers that are, like, zipping to make turns…..  *I try to - try to watch, but I had a very close call about, maybe, two weeks ago, and I hit the brakes and actually just kind of did a slide and, boom, went down, tr- you know, because the guy made an illegal left-hand turn and cut me off. I had the green, you know, for the crosswalk, he had a red arrow and - So, you know, it was just one of those things. (#24)*  M I think that a car, or any type of motor vehicle for that matter, making a turn without signaling is something that's almost unavoidable, because you're not sure if they're going you know, if they're turning -- if they don't have a turning signal, you can't anticipate the car's going to turn…..  *So, the first one, I was riding in the bike lane and a woman made a right-hand turn right through the bike lane, and I stopped short, right before hitting her car, and I ended up flipping over my bike. (#20)*  *M I was rear-ended on 6th Avenue – this was back in the ‘90s, by a bicycle messenger, and he had a fixed-gear and I braked suddenly – ‘cause, like, a bus was turning across me, and he smashed into the back of me, actually threw me under the bus, but fortunately I - I got out before the wheels went over me…..*  And then I guess, in the industrial areas like Bushwick, at night you've got to be pretty careful. Because those big semis, you know, when they're turning. (#18)  *M I feel as though the two incidents that I had were actually identical, which was a car that passed me, and then I was in the bike lane I'm in the bike lane and a car passed me, and then at the last minute decided he wanted -- the person wanted to make a right turn..... That happened to me twice last year - it was the identical situation, where I was passing the car on my right, and the car put out a signal and decided to turn. That's a - that's a danger. I also feel as though, obviously, left-hand turns are a big problem. (#5)*  F They don't look when they make turns….. the biggest problem with this is usually left turns, because the drivers don't see you….. When cars are making a left turn and they don't look. (#11)  M People turning - making a turn and not really paying attention to your presence, so either you - if you don't stop, you basically run into the side of the car. (#19)  M Cars are the biggest danger - cars not paying attention when turning, or passengers of cars exiting without looking at their surroundings…..  If somebody is speeding through an intersection to turn left or is running a red light, there's only so much you can do to react to that. (#21)  F People, like, turning into the bike la- like, cars turning into the bike lanes, potentially causing me to, like, ride my bike straight into the car if I weren't to brake. They clearly don't look and see if there's a bike coming before they turn…..  Yeah, they're kind of scary I mean, I hate being on the road with trucks and buses, and I know that a lot of bike accidents have occurred with, like, with tractor-trailers and buses that are turning at intersections, which is also partly why I try to avoid busier streets like Atlantic or Flatbush. (#23)  M Many times they don't see you and then they'll try to, without signaling, to turn left or right. (#12)  F Cars that don't signal when they're turning left. (#17)  F [Pet peeves] Cars that don't use blinkers and (unintelligible word) turn right in front of you. I hate that. (#8)  M But then there's also another big hazard it's cars turning, so you have to so that can be a little unpredictable you have to pay attention to which way the turn is going to be. (#7)  F I slow down at every light and, you know, things like that, because -- just to make sure that you know, like [?] people will, I know, will cut if they want to turn right, so I usually just slow down and let them go, because -- yeah. Yeah, I think that is usually what I do. (#2) | |
