# Supplementary material for: Safety-oriented Practices of Adult Bicycle Ridersin Brooklyn, New York USA: An Interview Study
Source: Preprints.org preprint supplement (doi:10.20944/preprints202002.0159.v1), 2020-02-12
Supplement: Supplementary file 9 [file S41 Hazard Double-parking.docx]

| **Theme: Hazard: Double-parked vehicles. *[Have to enter car lane to get around them. (9)]*** | **Respondents** |
| --- | --- |
| **13 (6M, 7F)** |
| **Responses:**  *M They're trying to navigate around delivery trucks and we're trying to navigate around them, and there's just - you know - there's not a friendly share-the-road kind of attitude with a lot of the motor vehiclists. (#1)*  *F If folks are double-parked, then you have to they have their flashers on - you have to kind of go closer to the yellow line at the center of the road to go around them, and then people aren't expecting you on the other side, or maybe the car that's double-parked starts to pull out, and I've almost gotten kind of - I don't know - those are the situations, I think, that I find I feel are the most dangerous because I have to now, like, veer off of the bike path - or the bike lane. (#10)*  *F Double-parked in the bike lanes - again, it forces you to go into the car lane, and what's frustrating is, sometimes they're parked, and then you're trying to go around them and then they'll start moving forward and out - defeats the purpose, so like, I see this all the time in Brooklyn. (#11)*  M And I guess the last thing is police and other vehicles that park in the bike lane. It's extremely common, and it puts bikers in dangerous positions. (#12)  *M It's a problem because in many instances, in congested neighborhoods, people who can't find a place to park, they double-park next to a car that is already parked and they block the bike lane. And so, when you're a bike rider, you're biking on the bike lanes, and you're confronted with a car that's double-parked blocking your bike lane, and now you have to maneuver and get out of the way, but then look: You are now riding in the middle of the street. (#13)*  *F When people stop in their vehicles and they don't use their hazard lights, but they just literally stop in the middle of the road and there's tons of traffic, and it's really hard to navigate around the parked car because cars - yeah, the drivers don't let you in, they're just, like, whatever, I'm also - I'm going somewhere also, so they don't - they're not considerate of cyclists (unintelligible) traffic. (#16)*  M Yeah, when people park in the bike lane. Or, you know, especially, like, the TLC guys, you know, they'll just pull into the bike lane and dump their passengers, and you have to slam on your brakes - that's really annoying. (#18)  *M And cars, I suppose, that are parked in the cycle lanes, for example, and you're having to then move out into traffic - that's a problem. (#19)*  *F ….. and double - like, the double-parking, that I have to, like, go on the street in cars - so, to avoid that, I think, I just don't bike too fast. (#2)*  *M From the perspective of safety, while Brooklyn has great bike lanes, I've noticed that a lot of cars will pull over to the side of the street, blocking the bike lanes, which can lead to unsafe biking, having to get around cars to avoid a car pulled over in the bike lane. (#21)*  F Always there's double-parking, especially when it's, you know, opposite side parking and in the morning and folks are moving back and forth, you have to be really cautious of that, and then at nighttime, especially, like, on dark streets, you just have to be really aware of that as well because really, you'll run into them. (#22)  F Obstruction of bike lanes: cars parked in the bike lanes, cars driving in the bike lanes, like, moving cars in the bike lanes. (#23)  *F Even if you're on a street that has bike lanes, there's a lot of, you know, cars using the bike lanes as - drivers use it as their personal parking space, which forces me and any other person on a bicycle - forces us into traffic. (#24)* | |
