# Supplementary material for: Safety-oriented Practices of Adult Bicycle Ridersin Brooklyn, New York USA: An Interview Study
Source: Preprints.org preprint supplement (doi:10.20944/preprints202002.0159.v1), 2020-02-12
Supplement: Supplementary file 11 [file S42 Hazard Unsafe driver actions.docx]

| **Theme: Hazard: Unsafe driver actions: Lane incursions.** | **Respondents** |
| --- | --- |
| **6 (4M, 2F)** |
| **Responses:**  F And then when cars come into your lane. (#11)  M I think the most common ones are sort of sudden violations of the bike lane - so, vehicles suddenly pulling into the bike lane - on the Kent Avenue bike path, which I take, sometimes, like, 18-wheelers will make wide turns that suddenly go into the bike lane, that you wouldn't know. (#12)  F I kind of, like, anticipate that if I have a conflict, like, either on my turn or they might change lanes without looking, you know, without, like, caring that I am there. (#2)  M A lot of motor vehicles do not respect the bike lanes. (#20)  M Cars switching lanes without looking. (#4)  M Somebody did a u-turn across all six lanes and, yeah, knocked me down and drove over me. (#18) | |

| **Theme: Hazard: Unsafe driver actions: Running red lights.** | **Respondents** |
| --- | --- |
| **3 (1M, 2F)** |
| **Responses:**  F Or when people do not abide by traffic laws, like cars and bicyclists, and they just run past stop signs, they don't stop at red lights. (#16)  M If somebody is speeding through an intersection to turn left or is running a red light, there's only so much you can do to react to that. (#21)  F You know, drivers that decide to just go through lights are unpredictable. (#24) | |

| **Theme: Hazard: Unsafe driver actions: Speeding.** | **Respondents** |
| --- | --- |
| **4 (3M, 1F)** |
| **Responses:**  M A lot of the avenues in Brooklyn, once the green lights change so that there's a bigger stretch, those cars drive, like, insanely fast, so just be careful at night. (#1)  F Maybe they're going over the speed limit and they fly, like, right by you, inches away from you. (#11)  M Cars. Cars - and irresponsible drivers. [Did you say irresponsible drivers?] Irresponsible drivers - yeah. [f/u Q: Besides what you've already said about that in the last question, do you want to give any more detail on the ways that you feel they're irresponsible?] Well, they drive too fast, that's one thing. (#13)  M UPS trucks – the UPS trucks, the Fedex trucks, the USPS trucks creating dangerous on the road – more than trucks. [f/u Q: Can you describe what they do that makes them especially --] They speed – they speed a lot. Especially UPS. (#4) | |

Other Comment:

But also cars will make sudden movements that are pretty hard to predict. (#7)
