# Supplementary material for: Safety-oriented Practices of Adult Bicycle Ridersin Brooklyn, New York USA: An Interview Study
Source: Preprints.org preprint supplement (doi:10.20944/preprints202002.0159.v1), 2020-02-12
Supplement: Supplementary file 13 [file S43 Hazard Pedestrians.docx]

| **Theme: Hazard: Pedestrians: Unpredictable.** | **Respondents** |
| --- | --- |
| **7 (2M, 5F)** |
| **Responses:**  F Pedestrians could be very unpredictable, so if you're going at a high speed, like, downhill, and, like, a pedestrian just walks into the bike lane, there's no way you can stop on time. (#11)  F Slow down for them, like, stop for them, like, give them give them the right-of-way and, like like, watch out because, like, New Yorkers they're just going to cross any - anytime that they want, really like, you can kind of predict it, but also, like, I've had, like, moments where I'm looking at the pedestrians and they're just - it looks like, okay they're just not going to move, and then and then there's, like, some other distraction and then, like, next thing I know they're walking. (#17)  F Pedestrians: Always be cautious - they can come out from any direction. (#22)  F Unfortunately, unpredictable. But, I try to keep an eye out and expect the unexpected. (#24)  F And then I guess the other real hazard is pedestrians who just come out of nowhere. (#6)  M I think, yeah, a pedestrian suddenly entering the street is very hard to predict, because you can't always - you can't always see, you know, if they go between cars and stuff...... so I guess it's, yeah, unpredictable behavior by other cyclists, pedestrians, and cars..... (#7)  M Just checking to see if any pedestrians are trying to, like, cross in between parked cars, because they don't all cross on the corners, and making sure that somebody just doesn't dart out and I run into them. (#20) | |

| **Theme: Hazard: Pedestrians: Disregard of rules, others.** | **Respondents** |
| --- | --- |
| **8 (4M, 4F)** |
| **Responses:**  M Once I hit a pedestrian, when I started. It was on the crossing and I had the green light, but some woman couldn't decide if she wanted to cross, or she wanted to stop, she wanted to back up, and I was yet a beginner. I hit her. But it happened. She fell, I fell. (#14)  F Slow down for them, like, stop for them, like, give them give them the right-of-way and, like like, watch out because, like, New Yorkers they're just going to cross any - anytime that they want, really like, you can kind of predict it, but also, like, I've had, like, moments where I'm looking at the pedestrians and they're just - it looks like, okay they're just not going to move, and then and then there's, like, some other distraction and then, like, next thing I know they're walking. (#17)  M What is it, is it the Kent Avenue? the Kent Avenue bike lane. So, it's like those bike lanes where you can get up a decent bit of speed, and they still walk out, they ignore the they jaywalk, they ignore the traffic signals. (#18)  M Pedestrians that don't acknowledge you and will step out in front of you, feeling that you're not worthy of them having to slow down. (#19)  F And people I mean, like, you know, if I come to, like, a light, a cross street and you know even if I have the light, if there are people I usually - I'm usually careful, I slow down because I know they will cross anyway so, yeah I try to, like, watch out for all those things and not go through, like, light that fast because I know people – yeah. (#2)  M Ooh oh yeah, that's something I forgot, and it inhibits or - hurts safety. Sometimes pedestrians will walk in the bike lane, especially in Manhattan on more crowded streets. so, pedestrians: you should always give them the right-of-way, but there's sometimes where they are not obeying traffic signs or they're not - it's not their time to go but still you need to be cautious and mindful of them even if they're in the wrong. (#21)  F always just like, same thing you would do when you're driving a car kind of anticipate what other people are doing, especially with pedestrians, so even if they don't have the right-of-way or the light but if there are not cars coming, then they tend to cross the street anyway, even if they see a bike, so kind of anticipating that. (#22)  F I use my little beeper thingee, because people don't pay attention in New York and they are all going to work crossing on red light. (#8) | |

| **Theme: Hazard: Pedestrians: In the bike lanes.** | **Respondents** |
| --- | --- |
| **6 (4M, 2F)** |
| **Responses:**  F The most dangerous things is when pedestrians just come into the bike lane - that's definitely number one pet peeve. (#11)  M Pedestrians - Know your neighborhood. I think in some neighborhoods where people ride bicycles frequently, you can sort of count on unobstructed bike lanes, but if it's a neighborhood where, just for various reasons, people don't really ride bikes - local population - assume that people consider the bike lane part of the sidewalk. (#12)  M One accident was, it was nighttime, I turned left off of a one-way street directly into a bike lane. I had a green light, and there was a pedestrian jogging in the bike lane going the opposite direction, the wrong way, so that - and that, you know - I couldn't see the person jogging because of parked cars, and we had a collision. (#15)  M Ooh- oh yeah, that's something I forgot, and it inhibits or - hurts safety. Sometimes pedestrians will walk in the bike lane, especially in Manhattan on more crowded streets. So, pedestrians: you should always give them the right-of-way, but there's sometimes where they are not obeying traffic signs or they're not - it's not their time to go but still you need to be cautious and mindful of them even if they're in the wrong. (#21)  F And that's not even getting into the pedestrians that step out into the street without looking, or walk in bicycle lanes, jog in bicycle lanes things of that sort. So, I think that bike riders really are kind of at the bottom of the pecking order in terms of - in terms of street use and safety, and have to just be incredibly vigilant. (#24)  M Not paying attention. [f/u Q: I know you have already said some things about riding around pedestrians any other thoughts about how to ride safely around pedestrians?] Just really see what the people are up to, like, be aware if people are aware of you or not, you know, like try to -- I feel like one thing that happens too is that it's almost, like, good to just really, like -- like, you have to be aware of where all the pedestrians are but, like, if you just stare at them, then sometimes people can almost maybe feel like, they get into this, like, pause panic mode, like if somebody just inadvertently steps in front of you like, if somebody just, like, walks into the bike lane and they're not paying attention, sometimes then they will look, like so even though you've already just decided, like like I guess what am I trying to say? like, some- you can -- you can see how somebody's walking and then and then just sort of, like, set your trajectory so you're going to pass just behind them if they continue at their present rate, you know. But then sometimes people will -- so you'll sort of have that in mind if you see this person, like, just bumbling into the road or whatever, and then what will happen is, like, sometimes then they will look or they'll hear you coming or whatever, and then they just -- they look up, and then they get scared and they pause, and so then you get into this thing where, like, oh now I have to go ahead of you, or, like, or are you going to go forward or whatever? or I'm just going to stop, you know, like -- so I feel like, one good thing to do is, like, just really kind of, like, try to, with your gaze even, communicate to others that, like, you -- you are going to go past them like, like -- you don't want to, like, be staring at them necessarily, and more just sort of, like -- that they see that you're focused, like, on the I don't know way around them -- I guess. And just don't get so, like, hot and mad at the people, because it's, like, of course they're not paying attention, you know. (#9) | |

| **Theme: Hazard: Pedestrians: Not paying attention.** | **Respondents** |
| --- | --- |
| **10 (5M, 5F)** |
| **Responses:**  F Watch out for pedestrians, because they never look. (#11)  M [Pedestrians] You know, pay attention to them, because they're most likely not paying attention to cyclists. (#15)  M It’s mostly people not looking before they are doing something ….. people trying to cross the street not at a crosswalk without looking. (#4)  F I use my bell a lot when there are a lot of pedestrians, because they don't pay attention. And I don't ride too fast. (#2)  F [For a bicycle rider in Brooklyn, what are the most common dangers or hazards that confront a bicycle rider?] Yeah, I would say definitely, double-parked cars, and also, like, pedestrians who aren't paying attention, and, like, delivery men who have, like, the motorized bikes. (#22)  F And that's not even getting into the pedestrians that step out into the street without looking, or walk in bicycle lanes, jog in bicycle lanes - things of that sort. So, I think that bike riders really are kind of at the bottom of the pecking order in terms of - in terms of street use and safety, and have to just be incredibly vigilant. (#24)  M And also pedestrians, I wrote down, also pedestrians. You know, if I see someone walking perpendicular on the sidewalk, to the sidewalk, that means they're going to come out into the street, so if there's a van or a big truck, you know, I'm - again, I look back to make sure I'm able to swerve, sometimes, you know, I ring my bell to let people know that, you know - I'm anticipating them jumping out, they're not looking. (#3)  F I use my little beeper thingee, because people don't pay attention in New York - and they are all going to work crossing on red light. (#8)  M Not paying attention. [f/u Q: I know you have already said some things about riding around pedestrians any other thoughts about how to ride safely around pedestrians?] Just really see what the people are up to, like, be aware if people are aware of you or not, you know, like try to - I feel like one thing that happens too is that it's almost, like, good to just really, like - like, you have to be aware of where all the pedestrians are but, like, if you just stare at them, then sometimes people can almost maybe feel like, they get into this, like, pause panic mode, like if somebody just inadvertently steps in front of you like, if somebody just, like, walks into the bike lane and they're not paying attention, sometimes then they will look, like so even though you've already just decided, like like I guess what am I trying to say? like, some- you can - you can see how somebody's walking and then and then just sort of, like, set your trajectory so you're going to pass just behind them if they continue at their present rate, you know. But then sometimes people will - so you'll sort of have that in mind if you see this person, like, just bumbling into the road or whatever, and then what will happen is, like, sometimes then they will look or they'll hear you coming or whatever, and then they just - they look up, and then they get scared and they pause, and so then you get into this thing where, like, oh now I have to go ahead of you, or, like, or are you going to go forward or whatever? or I'm just going to stop, you know, like - so I feel like, one good thing to do is, like, just really kind of, like, try to, with your gaze even, communicate to others that, like, you - you are going to go past them like, like - you don't want to, like, be staring at them necessarily, and more just sort of, like - that they see that you're focused, like, on the I don't know way around them - I guess. And just don't get so, like, hot and mad at the people, because it's, like, of course they're not paying attention, you know. (#9)  M [Pedestrians] Are never aware that you’re there. (#20) | |

| **Theme: Hazard: Pedestrians: Jaywalking.** | **Respondents** |
| --- | --- |
| **6 (4M, 2F)** |
| **Responses:**  M Pedestrians - Usually I expect them on the crossing, but sometimes I know they are jaywalking, you know? So- I watch them also, I keep my eye on the - on the sidewalk to see somebody trying to cross beyond the beyond the pedestrian crossing. (#14)  F And then there was one with a couple pedestrians it was raining, and there were all these ca- parked cars well, not parked cars, but the traffic was just, like, really slow in the street, so these kids decided to just, like, run through the cars while they were stopped. And I saw them, and I was braking, but because it was raining my bike was just, like, slidding, and, like, yeah, I, like, knocked a girl on her butt. She was okay. (#17)  M What is it, is it the Kent Avenue? the Kent Avenue bike lane. So, it's like those bike lanes where you can get up a decent bit of speed, and they still walk out, they ignore the - they jaywalk, they ignore the traffic signals. (#18)  M Just checking to see if any pedestrians are trying to, like, cross in between parked cars, because they don't all cross on the corners, and making sure that somebody just doesn't dart out and I run into them. (#20)  F The pedestrian who suddenly comes out of the middle of the block and expects you to stop on a dime. (#6)  M I think, yeah, a pedestrian suddenly entering the street is very hard to predict, because you can't always - you can't always see, you know, if they go between cars and stuff...... so I guess it's, yeah, unpredictable behavior by other cyclists, pedestrians, and cars..... (#7) | |
