# Supplementary material for: Safety-oriented Practices of Adult Bicycle Ridersin Brooklyn, New York USA: An Interview Study
Source: Preprints.org preprint supplement (doi:10.20944/preprints202002.0159.v1), 2020-02-12
Supplement: Supplementary file 15 [file S44 Hazard Roadway.docx]

| **Theme: Hazard: Roadway conditions.** | **Respondents** |
| --- | --- |
| **7 (3M, 4F)** |
| **Responses:**  M I also feel one of the challenges is, some of these roads are in very bad condition, so on top of trying to avoid cars and trucks and pedestrians and other cyclists, you also have to navigate around, like, some really crummy potholes and cracks and divots. (#1)  F When I think of this question, I think of, like, more like roadway condition kind of things. Yeah, so - That's the first thing that's maybe coming to mind - so, like, there are times, like, those big, like, potholes in the bike lane or in the roadway and there are times when you roll over them or you see them and you can slow down or go around them or kind of, like, you know, jump your wheels over them, but there's times when, like - man, I didn't see that until the really last thing and, you know, made me fall over or throw me from my bike or something, so those will sneak up on you because you're not necessarily inspecting the road right below you as you're riding…..  Other pet peeves that have to do with safety: I think I mentioned those, like, metal plates on the road that are, like that are very annoying to me. (#10)  M I would say for me the biggest obstacle is the condition of the road - the potholes, things like that. (#15)  F But it's awful hard, like, when there's so many potholes like, you really can't - I've tried it, you know - like, avoid them, but, like, you really can't, like, bike in a straight line with all the potholes. (#17)  M The other thing I didn't mention was potholes, I mean, obviously - riding in traffic and you're following a car, you don't get much warning if there's a big hole, so - and if you don't know the route, it's - that can be a bit that can be scary - so, yeah, (unintelligible word) look for potholes. (#18)  F And, you know, I am very worried about holes on the street too and that I might fall off my bike. (#2)  F You have to be careful also because there are a lot of potholes, even in the bike lanes. (#22) | |
