# Supplementary material for: Safety-oriented Practices of Adult Bicycle Ridersin Brooklyn, New York USA: An Interview Study
Source: Preprints.org preprint supplement (doi:10.20944/preprints202002.0159.v1), 2020-02-12
Supplement: Supplementary file 17 [file S45 Hazard Bike riders.docx]

| **Theme: Hazard: Bicycle riders going the wrong way.** | **Respondents** |
| --- | --- |
| **6 (3M, 3F)** |
| **Responses:**  M I think, you know - riding the wrong way on, like, a side street is okay, but, you know, if you're riding the wrong way on a very busy avenue or street, that's also something that's dangerous. Like, I know everybody does it every once in a while where they just kind of use - having a bike's to their advantage of going through a red light or going the wrong way down a one-way or whatever -- you know, you have to - in my opinion, you've got to pick and choose when you're going to do that. It's okay for me to do it on a side street, but I've had people come straight up on me on, you know, Second Avenue in Manhattan, and it's, you know - it's just so dangerous. (#1)  M And also, again on cycle lanes, cyclists, especially food delivery riders, coming the wrong way and you're having to move out of their way, again into traffic, so out of safety into - into a danger zone, so to speak. (#19)  F Sometimes I'm in my bike lane going one way and I have someone coming right at me, using the bike lane but in the wrong direction. (#23)  F If you're in a bike lane and you're going the right way and this person's coming at you, then it's, like, okay now where do I go? And I usually try I try to hold me ground. They - If they're going to - If they're going to do something, let them move out of the lane, you know? Why should I put myself at risk? So I try to kind of position myself so that they have to make that move. (#24)  F [Are there dangers or hazards that are difficult or impossible for a bicycle rider to see and react to?] Well, both of the things I mentioned, you know - dooring and pedestrians coming out of nowhere. Or – a bike rider on the wrong - you know, going up the wrong way. (#6)  M I don't like when bicyclists ride on the wrong side of the bike lane. I've had experiences with that on a daily basis, where there's a cyclist, and I'm in the bike lane and going the correct direction, and the cyclist is also coming, you know, head-on with me in the wrong side of the bike lane, (garbled). (#20) | |
