# Supplementary material for: Safety-oriented Practices of Adult Bicycle Ridersin Brooklyn, New York USA: An Interview Study
Source: Preprints.org preprint supplement (doi:10.20944/preprints202002.0159.v1), 2020-02-12
Supplement: Supplementary file 19 [file S46 Dangerous bicycling behaviors.xlsx]

## Sheet: Sheet1
	Category	Code	Wrong way	zigzaging	Not in bike lane	No helmet	running red light	Speeding	Distractions	No bike lights	No signals	No right-of-way	Gender	Case #	Text
	Dangers/Hazards	Dangerous bicyclist behaviors	1	1		1				1			F	23	Oh I mean swerving out of the bike lane into the normal lane, swerving in and out of traffic of all types, running red lights, not using bike lights, not using helmet -- although I am also guilty of that occasionally -- going the opposite way, like against traffic, when they shouldn't be -- like I -- sometimes I'm in my bike lane going one way and I have someone coming right at me, using the bike…
	Dangers/Hazards	Dangerous bicyclist behaviors				1			1		1		F	16	Number one thing: not wearing a helmet. I just don't understand. Yeah, that's, like, a number one priority not riding wearing a helmet. Not using proper contr-- like, signals like, bicyclists have signals, like right turn, left turn, when they're stopping -- You use your arm, you extend it, and I noticed a lot of cyclists don't do that they'll just run the stop sign, or turn, and then the car beh…
	Dangers/Hazards	Dangerous bicyclist behaviors	1			1	1						F	10	Riding riding against traffic or riding the opposite way down the bike lane. I think that see other bicycle riders do that is dangerous? I think I think, dangerous is kind of, like I guess it's all it's all relative, right? So, kind of what your own safety practice is, I suppose. So, like -- I almost always am riding with a helmet, but when I see others not riding with a helmet, like, I don't -- …
	Dangers/Hazards	Dangerous bicyclist behaviors			1	1							M	13	I've seen, for example, bicycle riders ride their bicycles on bridges that cl-- are clearly designated for pedestrians and where bicycle riding is clearly prohibited -- I see that often on the bridge that connects the Rockaways with Brooklyn [The Gil Hodges Bridge?] yeah, the Gil Hodges Bridge. I see that on the Broad Channel Bridge as well, that connects the Rockaways with Broad Channel. People …
	Dangers/Hazards	Dangerous bicyclist behaviors	1			1			1				M	4	Not wearing a helmet, in particularly the really dangerous roads. Going in the opposite of traffic. Cell phone usage on – while bike-riding. [I’m sorry – say that again.] Cell phone usage while on bike.
	Dangers/Hazards	Dangerous bicyclist behaviors		1	1		1	1					F	2	So, running through lights, like, going through red lights without slowing down at all. I think it's insane. Or, like, going through traffic yeah -- just, yeah that's I always like, that always gives me just seems insane, you know, going -- when there's lots of cars, just going, like, super-fast. Or like going you know, doing, like going from, you know, one side to the other side of the street, g…
	Dangers/Hazards	Dangerous bicyclist behaviors	1		1		1						F	11	I think rolling through a red light is dangerous. I mean -- Even though sometimes I do it myself, but like, if there are no cars coming at all, then I will roll the red, but I see bikers just going around cars as they're coming the opposite direction, that's dangerous to them. Or I see bikers, instead of biking on the bike lane, they're on the other side of the street. Or, like, when they come ba…
	Dangers/Hazards	Dangerous bicyclist behaviors		1				1					F	17	I guess, like, zigzagging through traffic. I feel like, maybe I'm just not comfortable enough to do that or just like going through an intersection, you know, like, while there's cars going through it. Yeah, some people just go really fast, but, I mean, maybe they, like, bike way more than I do. I think that's all I can think of.
	Dangers/Hazards	Dangerous bicyclist behaviors		1			1						F	22	I think, kind of, like, weaving through traffic often is a thing. Or and I mean, I'm guilty of it too, like, I don't always stop at red lights. But I've seen people, like -- usually it's, like, I'll do it when I feel, like, super confident it's clear, but I've seen people kind of chance it (some garbled stuff) Yeah, just like, not stopping at stop signs, or going through red lights without really…
	Dangers/Hazards	Dangerous bicyclist behaviors	1	1						1			F	24	Well, I see bike riders just going out when they don't have the light, weaving in and out of traffic. I think those are and riding at night with no lights! Oh my gosh! You know 20 bucks, you can get two frog lights, you put one on the front and one on the back, you know, and people will see you and it just blows me away that -- that, that, you know that they don't do that. But those are biggies. …
	Dangers/Hazards	Dangerous bicyclist behaviors							1				F	8	Just not paying enough attention, mostly.
	Dangers/Hazards	Dangerous bicyclist behaviors						1					F	6	Well, in the Park, the speedsters are dangerous. You know, they go in a pack, and -- I was there on Sunday, and you know, you don't have to stop for a red light if nobody's crossing, but they would just keep on going if there were children crossing scary. And, again, going the wrong way on a street.
	Dangers/Hazards	Dangerous bicyclist behaviors						1					F	23	But I do see people going, you know, zipping in and out and going really fast, which I think, especially if you get, you know if you do collide with someone or a car, then your injuries are potentially going to be a lot worse.
	Dangers/Hazards	Dangerous bicyclist behaviors		1	1			1	1			1	M	21	Please describe things you have seen other bicycle riders do that you consider to be dangerous. Bike through intersections when they don't have the right-of-way, especially biking through intersections when there is oncoming, like, traffic in the opposite direction. Texting while biking. Just just reckless biking in general. Biking quickly. Weaving in and out of cars, not staying in the bike lane…
	Dangers/Hazards	Dangerous bicyclist behaviors	1	1	1								M	20	Oh -- I ride in the City often, so I've seen cyclists cutting through traffic, and that's extremely dangerous. You know, swerving in -- and not riding the bike lanes, first of all dangerous -- and then cutting through traffic -- dangerous, as well as riding against traffic, I don't understand why so many people ride against traffic, so it's -- very dangerous thing. Yeah, those are the things that…
	Dangers/Hazards	Dangerous bicyclist behaviors	1					1	1				M	1	Anytime I see anybody riding with their music -- with their headphones in their ear, it's to me incredibly dangerous in New York City. I see a lot of cyclist doing that, I see a lot of cyclists you know, these people with the really expensive bikes and the really expensive get-ups, you know you know, racing their bikes on thoroughfares when it's, like, you know, Saturday afternoon or Sunday after…
	Dangers/Hazards	Dangerous bicyclist behaviors					1		1				M	19	I certainly don't believe in having headphones. I've seen cyclists text while cycling, which I think is completely insane. I myself will go through red lights, but I'm always slowing down, I'm always looking, I never inconvenience anyone who has the light, but cyclists who just simply go through an intersection without slowing down, with even looking I -- I it appalls me. But I see that every day…
	Dangers/Hazards	Dangerous bicyclist behaviors	1						1				M	3	Okay, again, you know, the earbuds, you knlw, listening to music, phone conversations. Salmoning which is riding against traffic. I never understood that. But, but you know, that, that -- And they refuse to move, if you go you know they're the ones that should be -- they have a better view of oncoming traffic I have to move out of the way.
	Dangers/Hazards	Dangerous bicyclist behaviors							1				M	12	I guess the only thing I will say is using headphones, like over-ear headphones. I think that's just the only thing I could complain about with bicyclists.
	Dangers/Hazards	Dangerous bicyclist behaviors	1				1	1					M	7	I think a lot of cyclists do ride through every red light, and I think that can be dangerous, because I mean, in, you know -- years ago, when you were the only one on the road, it's kind of, like it's not so, you know, noticeable, but when you have a number of cyclists all doing something unpredictable, it's -- it can be -- it's dangerous for everybody so that, I think, is a little bit of a probl…
	Dangers/Hazards	Dangerous bicyclist behaviors						1					M	14	Oh, I see a lot I told you about this electrical those guys are going fast and I don't know I don't have any statistics, but looks to me like there's a lot of accidents, (unintelligible word) -- because they are zooming very fast and they don't have time to watch, you know? They're not going to slow down, because it takes battery life, or whatever. And most of them are, I guess, delivery guys -- …
	Dangers/Hazards	Dangerous bicyclist behaviors	1				1						M	15	Going the wrong way on roads, and I feel like that, you know, if you're going to do something like that, it needs to be done with extreme caution and yielding to people going the correct way, and people don't do that at all, it's just like a free-for-all, kind of like they deserve to. And that kind of irritates me. I mean, I would be lying if I said I'd never done it, but I take extreme caution, …
	Dangers/Hazards	Dangerous bicyclist behaviors					1						M	5	Going through red lights. So, that's a whole perspective, like I don't know -- I -- you know cyclists do -- some of them slow down and then go through certain red lights. Some of them just cruise through red lights, speed through red lights. I also feel as though -- to me, cyclists my biggest problem with cyclists and red lights is the interaction with the pedestrians in the crosswalks. You know,…
	Dangers/Hazards	Dangerous bicyclist behaviors											M	9	Well riding a bicycle. [f/u Q: any specific behaviors?] Not really I mean, just knowing -- or not knowing how to ride a bicycle, I guess. Or just sort of I don't know --- I might consider it dangerous, is just being too aggressive and -- and just not, like, respecting the others on the road. [f/u Q: With regard to respect, what do you think are important things for bicycle riders to do to respect…
	Dangers/Hazards	Dangerous bicyclist behaviors											M	18	Well, I guess definitely riding a fixed gear with no front brake, I think it's stupid even if you lock the back wheel, it's still, like you know, it's still dumb. I guess the other thing is, you know, riding riding inbetween cars quickly I mean, you know, I used to do that, but at some point you get doored. What else? Generally I think, you know, cyclists aren't too dumb. I mean, I guess further …
			10	7	5	5	8	8	8	2	1	1
