# Supplementary material for: Safety-oriented Practices of Adult Bicycle Ridersin Brooklyn, New York USA: An Interview Study
Source: Preprints.org preprint supplement (doi:10.20944/preprints202002.0159.v1), 2020-02-12
Supplement: Supplementary file 21 [file S25 Theme Bike lanes etc.docx]

| **Theme: Use bike lanes when they are available.** | **Respondents** |
| --- | --- |
| **12 (5M, 7F)** |
| **Responses:**  F I try to stay in bike lanes. (#10)  M Use bike lanes, you know, use them when you can ….. (#18)  F I have said to, like, friends who have gone biking, that: use the bike lanes as much as possible, like, even if you have to go a few - like, 2 blocks up to get on the bike lane even if they have to ride for awhile on that street, do that. (#2)  M I stay in the bike lane as much as possible (#21)  F Try to, you know, obey the laws as much as you can, by, you know, riding in bike lanes when they're there, stopping at stop signs, stopping at red lights, just basically following the rules and the law. (#22)  F I would be staying - stay in my bike lane whenever possible. (#23)  F if it's a street that has a bike lane, stay in it as long as possible. (#8)  M I would have to say, try to plan your route ahead of time - map it out, try to stick to the bike paths as much as possible, where there is any. (#20)  M Number two, I would say bikers should stick to bike lanes. (#13)  F I would recommend to either use a designated bike lane, or stay as far to, like, the left or right, depending on what side you're on, to the curb as possible, even if there's, like - there's cars in that lane, just stay as close as possible, so that other passing cars can get by you. (#16)  F I always use a bike lane if it exists. And I go on the right side of the street if it doesn't. (#6)  M I'm keeping to - like I said - to a side of the road, either, like, I'm in the bike lane, or I'm choosing a side that I - is going to be less dangerous. (#7) | |

| **Theme: Avoid streets with a lot of traffic / Take streets with less traffic.** | **Respondents** |
| --- | --- |
| **7 (4M, 3F)** |
| **Responses:**  M But generally, I just try to avoid driving where there - to the extent possible, where there's congestion and traffic. (# 12)  F Then also my route as well, I'm thinking about, hey, can I take an alternate route? Maybe if I turn down this street, I'll, you know - there's less traffic and I'll get there safer ….. (#16)  M I would much rather ride a less trafficked street around Green-Wood Cemetery than I would go down, like, 5th Avenue or 4th Avenue in Brooklyn that doesn't have a bike lane - it's, like, three lanes and heavy traffic. So it's just a less-trafficked street. (#21)  F I choose to take roads, whenever I can, with less traffic on purpose or roads - and/or roads with bike lanes preferably, so I generally feel safe. (#23)  M And one of the things I do to avoid it is ride earlier in the morning when there's less traffic. You know, with getting out by ..... 7 o'clock, eight o'clock, I'm usually out, it's - there's a lot less traffic, and, and, you know, it's more pleasant. (#3)  M I seek out, like most cyclists seek out, roads that are less busy, or you get on a bike path, or you get on a street that only has one-sided traffic. (#5)  F I tend to avoid - I mean, I occasionally bike to a friend in Fort Greene, and I can be pretty much on back streets. (#6) | |
