# Supplementary material for: Safety-oriented Practices of Adult Bicycle Ridersin Brooklyn, New York USA: An Interview Study
Source: Preprints.org preprint supplement (doi:10.20944/preprints202002.0159.v1), 2020-02-12
Supplement: Supplementary file 25 [file S27 Theme sidewalk.docx]

| **Theme: Go onto the sidewalk if necessary.** | **Respondents** |
| --- | --- |
| **5 (3M, 2F)** |
| **Responses:**  F If you feel unsafe, and there's, like, too many cars blocking the street, like, too much traffic, go on the sidewalk - and just be slow and, like, be respectful of pedestrians, because your safety is more important than, like, risking being on the roadway. (#11)  M If things are extremely packed on the street, I will go on an empty sidewalk. (#12)  M I often find myself and my family, because my wife and I ride together 99% of the time, I find myself forced to sometimes ride on the - on pedestrian sidewalks. That's inappropriate, because now, I'm forced to share the space with pedestrians, and that creates another hazard. (#13)  F I do find myself on the -- riding on the sidewalk sometimes, when it's, like, a lot of traffic, and I can tell there's no way I'm going to get through all that congestion. (#16)  M And I said earlier that I never go on the sidewalk, but, like, sometimes if I'm going the wrong way and then I see, like, it's kind of a tight street, and then there's a car way down there that's going to be coming and I know it's going to be, like, kind of a funny little thing, I'll just sort of, like you know -- if it's in a quiet area I'll just go get up on the sidewalk for, like, twenty feet while the car goes by or something. But always very slowly, and sometimes even if I'm on the sidewalk I just take one of my feet off and, like, just kind of, like, ride and coast on one side of the bike, you know so -- just so that I can -- I'm, like half dismounted. (#9) | |
