# Supplementary material for: Safety-oriented Practices of Adult Bicycle Ridersin Brooklyn, New York USA: An Interview Study
Source: Preprints.org preprint supplement (doi:10.20944/preprints202002.0159.v1), 2020-02-12
Supplement: Supplementary file 27 [file S28 Theme Strategies Parked cars.docx]

| **Theme: Maintain space between you and parked cars.** | **Respondents** |
| --- | --- |
| **11 (7M, 4F)** |
| **Responses:**  F It's front-of-mind for me often, so I just try to maintain as much distance between my bike and the cars that I can, while staying in, like, the bike lane. (#10)  M As a bicycle rider, I am very careful not to approach parked cars, because you don't want to damage them or damage yourself. (#13)  M Dooring - I ride - well, the answer seems to be not to ride too close in to the cars, but then you have to, you know, you have to ride at 20 or 25 miles an hour, because otherwise then you risk getting hit from behind by a car - so that's getting doored. (#18)  F if I'm on a street that doesn't have a bike lane, I usually stay about a meter away from the cars that are parked, so that if there is anyone, like, coming out of a car or coming in between cars, I'm not, like -- I have some room to do something or to see them, I have an extra second or whatever to see them come out or open the door. (#2)  F Well, I try to keep my distance. I try -- I try to, you know, estimate a kind of a safe space. I mean, there have been times when I've had to yell, you know, and I've yelled out, “Hold the door.” And sometimes, you know, I'll see somebody, like, they're walking to their car and they'll start, you know, and he's got and I'll yell out, “Hold it.” And they'll look up and they'll wait, and then I always tell them, “Thank you.” Because I think that that, you know, it's pretty if it's not a conversation per se, but I think that they you know, people remember that, and it clues them in that this was an important thing that they you know, the fact that they took that moment and did look and did wait. (#24)  M I'm generally not biking within, like, less than three feet of, like, the parked cars that are next to my side, just so that if anything is to happen, you know, like with a door opening, I'm kind of outside of that. (#9)  M One danger I didn't mention before is car doors opening yeah, my brother, who also rides his bike, he got hit by a car door. People don't normally look out of their sideview mirror before they swing the door open and that's a dangerous thing, so I try not to get too close to the parked cars. (#20)  M You know, really, you cannot figure this out, so the best is to stay away, like, at least two-and-a-half feet, you know - if you can, but sometimes you can't , if you are in the traffic, you have to get closer. So in that case you have to slow down. (#14)  M There's a point where there's no time to react, and you can't keep - often you can't keep three feet away from cars, you don't have that kind of a space, so in a way you have to just hope that it happens a second or two before you get - you reach that point. Otherwise, as I say, there's nothing you can do, if that opens just at the last minute. [[I was going to ask if there are particular things you do while riding to avoid them but it sounds like - ] I've - I've - My perspective is to ride on the left side of - I mean, the right side of the street, because that's the driver's side when they come out of cars, and those are more likely to be coming out of cars because more likely to be only a driver than, say, a passenger. Drivers I think are more careful about their car, so they are more likely to be looking in the mirror and paying attention to you. Passengers, especially if they're children, are simply don't seem to be aware of that, so the left hand of the street in my - in my experience is a more dangerous side of the street. (#19)  M I tend to stay towards the outside of the lane, and then occasionally move into the lane. You know, when I spoke about that earlier: I sometimes have to pass something maybe parked. But for the most part, I would say I tend to want to stay out of the lane, or as much out of the lane as I can. You know, and once again, you know, if you back up a minute, you see parked cars - You know, you don't want to be, let's say, 12 inches from a parked car, all right? So you want to give yourself a healthy space from cars that are parked, but also you don't want to be in the middle of the street. So it's a little bit of that dance that we do when we're trying to be in a safe spot. (#5)  F I try not to stay close, like, I try to stay, like, a decent distance away from the cars on the left side. I try to see if, like, there's a blinker on, or maybe if there's, like, a car - or there's, like, a passenger in the car. (#17) | |

| **Theme: Be very watchful riding near parked cars; look for indications that someone is inside.** | **Respondents** |
| --- | --- |
| **12 (7M, 5F)** |
| **Responses:**  F I try not to stay close, like, I try to stay, like, a decent distance away from the cars on the left side. I try to see if, like, there's a blinker on, or maybe if there's, like, a car - or there's, like, a passenger in the car. (#17)  M Yeah, give them a berth so you can't get doored - try and see if there's anybody inside. (#18)  F Parked cars -- I think I touched on that earlier - whether they're, like, you know -- if they're parked on the side all the way on the side of the road for commercial parking, sometimes I look to try to see if there's someone in the driver's seat or not - to me - every once in a while you'll notice that there is someone in the driver's seat and that the car's not empty and then I think greater caution when going by because they're potentially more likely to open the door. (#10)  M Now I'm watching the mirrors, you know? If I see the mirror folded, I know there's nobody there, if I see it unfolded, I watch, you know? Suddenly, somebody can open the door. (#14)  F Kind of, like, keep an eye on it. You know, just like - If you see, if I see, like, the brake light on or the door, like, half open or, like, cracked open or, like, if the window is open, I know there is someone in the car who might open the door, or if I see a pedestrian, like, right by the car, then I can, you know, imagine that he will come in and out of the car. So it's just, yeah - just, like, paying attention, I guess. (#2)  M People - Mostly, when people park, or getting in and out of cars, you know, they swing the door open. You know, I myself, I drive an automobile also, and I'm more conscious, I look through my rearview mirror before opening up the door people still don't do that, and, again, I have to - if I see a car pulling in and the lights just shut off, you know, their parking lights or whatever, you know, they just took their foot off the brake, I know that the door's going to open up, so I have to prepare myself. I look back to make sure there's no car in my lane, you know, I'm prepared to swerve, you know. (#3)  M [Parked cars] Watch for those doors. And, there's not many people signal before they pull out of a parking spot, so I always try to check and see if there's a driver sitting in the seat of a parked car. (#20)  F Watch out for parked cars, who might open their doors on you. (#11)  M I'm watching the parked cars to see if someone's about to open their door. (#12)  M I feel like I just always try to pay attention to people in vehicles or, like, just doing a quick scan of parked cars. (#15)  F Parked cars I don't have a problem with, except I always - I'm always anticipating someone opening their door. So I'm just always aware: is there someone in the car? You know - what's going on? Is it abandoned or is someone inside? (#23)  M Parked cars are just, you know, dangerous because of the dooring, mainly, I feel like. So - You want to almost be looking if there are people in cars - you know and just I don't know - That's another reason why I generally, like, don't feel that bad about going the wrong way a lot - it's because I feel like, if I'm going the wrong way, I'm much more able to hug the parked cars, because I have a better view inside of all the vehicles, and also, like, if a door does happen to open, it's just - it's not going to be nearly as bad. (#9) | |
