# Supplementary material for: Safety-oriented Practices of Adult Bicycle Ridersin Brooklyn, New York USA: An Interview Study
Source: Preprints.org preprint supplement (doi:10.20944/preprints202002.0159.v1), 2020-02-12
Supplement: Supplementary file 35 [file S32 Theme Make presence known.docx]

**Theme: Make your presence known.**

| **Sub-theme: Communicate your presence audibly.** | **Respondents** |
| --- | --- |
| **10 (4M, 6F)** |
| **Responses:**  F I'll ring my bell to warn people that I'm here. (#11)  M Use your voice, use your words, you know “Excuse me, coming through on your right” - whatever. (#15)  F I use my bell a lot when there are a lot of pedestrians, because they don't pay attention. (#2)  F Making people - like, using my bike bell, you know, occasionally and making people aware that, like, this is a bike lane and I'm here - making my presence known. (#23)  F Well, I try to keep my distance. I try - I try to, you know, estimate a kind of a safe space. I mean, there have been times when I've had to yell, you know, and I've yelled out, “Hold the door.” And sometimes, you know, I'll see somebody, like, they're walking to their car and they'll start, you know, and he's got - and I'll yell out, “Hold it.” And they'll look up and they'll wait, and then I always tell them, “Thank you.” Because I think that that, you know, it's pretty - if it's not a conversation per se, but I think that they - you know, people remember that, and it clues them in that this was an important thing that they - you know, the fact that they took that moment and did look and did wait. (#24)  M I have a bell, I yell, you know. And I find the bell isn't always useful: you have to, you have to yell. (#3)  F Well, if it is getting dark, I have lights. And I have a bell. But usually I scream. [Sorry - usually it's what?] I scream - you know, “Watch it!” - or, you know, like that, yeah. (#6)  M And I also obey a lot of the traffic rules, like stopping at lights and, you know - signaling, and - you know, like, hand signaling, I do that - and also calling - you know, I have a bell: I ring, and actually will yell, you know, to alert people or cars of my presence, so that kind of thing, so those kinds of activities, I guess, to increase safety. (#7)  F I use my little beeper thingee, because people don't pay attention in New York and they are all going to work crossing on red light. (#8)  M I actually just got my wife riding bicycle as well and she commutes to work - it's a short commute for her but it still makes me very nervous at times when she's going to work, I'm constantly reminding her to be careful to watch for other vehicles that - or I tell her, always assume that people do not know you're there, that they don't see you. Make yourself known, if you have to scream out loud, if you have to ring the bell. (#20) | |

| **Sub-theme: Be visible: Use bike lights at night.** | **Respondents** |
| --- | --- |
| **10 (3M, 7F)** |
| **Responses:**  M I have lights - I have 3 different lights: I have one for headlight, I have a taillight, and I have, like, another spare one that I'll either use as another taillight or I'll put it on my helmet, as well as like, a headlamp kind of flashlight, which I use in the darker times. (#1)  F if it's at night, I have, like, lights flashing on my bike. (#10)  F Make sure you have lights, that's really important. (#11)  F I'd say to try to be as visible as you can, like definitely get a pair of lights if you're going to bike at night. (#17)  F When it's dark out, put your lights on, for sure. (#22)  F At night, of course, I always use my lights. (#23)  F Make yourself visible - lights, a blinking red light, even in the daytime, can be a real plus in terms of visibility…… I've got a helmet which has a little blinky light on top, as well as some reflective stuff. And, particularly at night, I'll use that, because it may put me more in the line of vision than the lower-down blinky lights. (#24)  M Another thing obviously is lights - I sure like - lights are important, so I put lights on my bike - simple lights: red in the back, white in the front - I like the ones that flash, they give you a little bit more attention than the ones that stream the light. They're basically all on my bike. ..... I definitely put them on my gear or on my bike. I feel like that helps me avoid crashes. (#5)  F Well, if it is getting dark, I have lights. And I have a bell. But usually I scream. [Sorry usually it's what?] I scream you know, “Watch it!” or, you know, like that, yeah. (#6)  M I always ride - I would recommend also that, if you don't have - reflectors is not enough - I use lights on my bike, on both front and rear. (#20) | |
