# Supplementary material for: Safety-oriented Practices of Adult Bicycle Ridersin Brooklyn, New York USA: An Interview Study
Source: Preprints.org preprint supplement (doi:10.20944/preprints202002.0159.v1), 2020-02-12
Supplement: Supplementary file 37 [file S33 Theme Check before proceeding.docx]

**Theme: Make sure it is safe before proceeding.**

| **Sub-theme: Look before you go.** | **Respondents** |
| --- | --- |
| **11 (4M, 7F)** |
| **Responses:**  F I always look - I always look in the direction of traffic, if not both ways, when I'm crossing an intersection. So I either slow down enough or I have enough of a view of the intersection to see if there are cars coming in, you know, whatever direction they may be coming from. Yeah, I'm very cautious with that. And I don't just trust the light, because if the light is green, like, I always - I always look both directions before crossing an intersection. (#10)  M So the safest thing to do is just completely stop, look behind you, look around you to make sure you could make a safe pass, and then you pass it and you - and you go on. (#13)  M And I'm not trying to make some - unanticipated movement, right? Going toward the way of - because I know if I make a left turn or right turn without making sure that I'm safe, I'm not doing this. (#14)  F ….. really making sure I look before I do any turn or, like, cross the street. (#17)  M As I approach an intersection, I am looking at the traffic light, I'm looking at traffic around me. If I need to get over to the left lane, I raise my left arm to show - to signal that I am merging, and I also make sure that there is space and it is safe for me to merge. As I'm entering the intersection, I'm making sure that it's clear, I'm not cutting off any bikes, and I have a clear path to make the turn. (#21)  F Just to be, like, extra cautious, making sure, like, when I'm going around the double-parked cars that, like, I'm not going, like, riding into traffic coming on. (#22)  F And, don't dash out into (intersections), because you don't know what's coming. (#24)  M Then one time I did get kind of, like - I had committed to an intersection without realizing that it was a two-way street until, like, the last second and then saw that I was imminently about to be hit, so I did get hit from the left side, but I was fine..... So that was also a good lesson. (#9)  F And oh - don't trust that people will actually stop at red - so make sure that you're looking. Yeah. Just be very distrustful of traffic. (#11)  F And people - I mean, like, you know, if I come to, like, a light, a cross street and - you know - even if I have the light, if there are people I usually - I'm usually careful, I slow down because I know they will cross anyway - so, yeah - I try to, like, watch out for all those things and not go through, like, light that fast because I know people - (#2)  F If I'm ever crossing at an intersection, I'll always look to see what's going on in my peripheral vision, to see if there's a (garbled word) car turning, and if there is, I usually anticipate, then I'll have to brake, and then I usually mutter something under my breath. (#23) | |

| **Sub-theme: Don’t assume you have the right-of-way.** | **Respondents** |
| --- | --- |
| **13 (7M, 6F)** |
| **Responses:**  F I tend to assume, in practice, even though I wish it wasn't the case, that, like, the cars won't see me, or that even if I have a right-of-way, even though maybe that's the case, it doesn't necessarily mean a car's expecting that or will do that so I have to defer obviously to, like - to cars if I'm feeling like it's risky. (#10)  F Yeah, so if it's, like, a stop sign or a two-way stop sign, make sure you have the right-of-way, and even if it is your right-of-way, like, you still have to double-check, because people won't stop for you - everyone's always in a rush or trying to make a turn, or maybe there's a pedestrian coming. (#11)  M Right-of-way depends on in what situation, but basically, I know that I will be always the one that will be harmed, so if I'm in the questionable situation, I let them go, you know? (#14)  F Seriously, I'm, like, I don't really think I - I think that bikers should have the right-of-way, but realistically, it kind of depends on who's driving and who's going to give you the passage. Yeah, I feel like people who are, like, more vulnerable like pedestrians and bikers should have the right, but, like, it's not always the case, so I would say it's, like, don't always assume. (#17)  F [Right-of-way] Don't always assume that folks really follow that. (#22)  M [Right-of-way] Don't assume you have it. I did - and I flipped over and almost got hit. (#20)  M Right-of-way - Assume that driver's won't respect your signaling or right-of-way. I've had many times I signal and start a lane change and a driver will just go through. So cars always have the right-of-way - and police, double! (#12)  M Don't expect pedestrians or cars to yield to you - you should take control and ride safely around them. (#15)  M On a bicycle, don't believe you ever have the right-of-way. (#18)  M I always give people the right-of-way. (#19)  F I just don't trust others to respect my right-of-way so I act like if I did not have it. So I yeah, because - I feel like, as a biker, like, people don't really take you seriously, like, pedestrians, because you're not a car, will cut in front of you and cars will cut in front of you because you are just a bike. (#2)  F I usually give way to a car - they're so much bigger. (#6)  M Pedestrians number one, then cars, then bikes. [f/u Q: In that order, are you saying?] I think so, because pedestrians have the right just because they're frail, cars have the right because they're huge, and then bikes are maneuverable and quick and light, you know - so it's just like we have a much - since we have more ways that we can choose, maybe we have the, like, last right-of-way, I feel like. (#9) | |

| **Sub-theme: Yield right-of-way to pedestrians.** | **Respondents** |
| --- | --- |
| **8 (5M, 3F)** |
| **Responses:**  M So, pedestrians: you should always give them the right-of-way, but there's sometimes where they are not obeying traffic signs or they're not - it's not their time to go but still you need to be cautious and mindful of them even if they're in the wrong. (#21)  F Well - I yield to pedestrians. I would hope that drivers would yield to me and respect my right-of-way particularly, you know, if I've got a walk - there's a walk sign and I'm at a green light and I'm trying to go across an intersection. (#24)  M They pretty much have the right-of-way. You know, when I come to a crosswalk and someone's walking by, I don't go past them, I don't try to, you know - I stop and let them cross in front of me. (#3)  M Pedestrians have right-of-way, trucks have right-of-way by size. (#4)  F Slow down for them, like, stop for them, like, give them give them the right-of-way and, like like, watch out because, like, New Yorkers they're just going to cross any -- anytime that they want, really like, you can kind of predict it, but also, like, I've had, like, moments where I'm looking at the pedestrians and they're just -- it looks like, okay they're just not going to move, and then and then there's, like, some other distraction and then, like, next thing I know they're walking. (#17)  M pedestrians number one, then cars, then bikes. [f/u Q: In that order, are you saying?] I think so, because pedestrians have the right just because they're frail, cars have the right because they're huge, and then bikes are maneuverable and quick and light, you know -- so it's just like we have a much since we have more ways that we can choose, maybe we have the, like, last right-of-way, I feel like…..  To never get upset with pedestrians, and to and to yield to them completely, and then to -- to generally be out of the -- out so, like, give cars a pass. And to be predictable like, to not just be like -- if you're going to do something, you want to be signaling, you want to, you know, just sort of be looking to make sure that the way is clear. But I feel like it's less out of respect for the cars and more with the cars -- with the cars, it's more just like, I don't want to get hit by a car, you know. So it's really important to me that I'm looking out for them and then with the people, I feel like people, you know, like -- since they don't have any mode of conveyance, then they sort of are the primary ones to be respected, you know. Like, I have a thing Like, like, a car has a thing that weighs a lot more than me, and I have a thing that weighs a lot more than just a person, so and also, I'm able to travel very -- much more quickly, so I don't know -- I feel like that's the main thing, but -- but -- I don't really like, sometimes I see people just yelling a lot, at, like, if somebody steps into the bike lane or if there's some other kind of problem. People screaming, I don't really like it. (#9)  F Be respectful of pedestrians at their crossings. (#11)  M You still have to have an utmost respect for people that are crossing in that crosswalk. And I think that's a real concern that I see, it's an unfortunate - and I think that's why cyclists really earn a little bit of their - the ire of, you know, the public. I think - I think - you know, the interaction with cars is one thing, but to interact with people that are on the streets walking or, you know, doing other forms of exercise like running - yeah, I think that's a big prob- to me, that's - that's my biggest issue with cyclists and how they interact with pedestrians - not so much how they interact with cars, but how they interact with pedestrians. (#5) | |

| **Sub-theme: Adhere to the right-of-way rules.** | **Respondents** |
| --- | --- |
| **5 (4M, 1F)** |
| **Responses:**  M Right-of-way You know - cars, pedestrians, school buses, buses - you know - you've got to respect who has it. (#1)  M [f/u Q: Can you describe what you do to make sure you have the right-of-way?] Make sure that the walk sign is on, the light is green or that I have a left turn - a turn arrow. So, just following traffic signs that say that I have the right-of-way. (#21)  F I mean, same as cars, right? I just generally obey the car traffic laws when it comes to right-of-way. (#23)  M Whoever gets there first should have the right-of-way, but that doesn't, you know - sometimes you see these guys in these big trucks you're on a bicycle and they just want to mow - you know, mow you over. People - I shouldn't say guys people with big trucks, you know, just want to but, you know - whoever gets there first, and, you know - the people to the right, you know, these things you learn in the safety course. [f/u Q: Do you feel that there's anything particular you need to do with regard to the right-of-way to stay safe?] No not really. Look If somebody's moving - If someone's in a car, you know, and they want to take You know, I'm on a bicycle, I'm going to let them go you know - there's no way I'm going to stop them. But, you know there should you know - whoever gets there first should have the right-of-way, the person to the right, whatever. (#3)  M Right-of-way to me is pre-eminent, very important, but it also means that everybody's got to be on the same page with that, as far as right-of-way. I think that's kind of important, I think everybody's got their own feeling as to who has the right-of-way. (#5) | |
