# Supplementary material for: Safety-oriented Practices of Adult Bicycle Ridersin Brooklyn, New York USA: An Interview Study
Source: Preprints.org preprint supplement (doi:10.20944/preprints202002.0159.v1), 2020-02-12
Supplement: Supplementary file 39 [file S34 Theme Obey traffic signals.docx]

| **Theme: Obey traffic signals.** | **Respondents** |
| --- | --- |
| **11 (6M, 5F)** |
| **Responses:**  M [Traffic signs and signals] Paying attention to them - they're like your allies. They're your friends, they're not obstacles. (#1)  F Traffic signs - so, stop when there's a red light. Yeah. And oh - don't trust that people will actually stop at red so make sure that you're looking. Yeah. Just be very distrustful of traffic. (#11)  M [Intersections] Stop at red, go on green. [Traffic signs and signals] Imagine that you are a motorcycle. [I’m sorry – say that again.] Imagine that you are a motorcycle, so follow the same rules. (#4)  M I wouldn't encourage them to go through a red light. I've been stopped myself a couple of times for this, but I would certainly say you should always slow down and be aware of what's coming. If it's not your light, you shouldn't be going through, cutting off pedestrians or cutting off cars. It's - I think that's probably the number one advice I would give. (#19)  F Try to, you know, obey the laws as much as you can, by, you know, riding in bike lanes when they're there, stopping at stop signs, stopping at red lights, just basically following the rules and the law. (#22)  F just obeying, you know, traffic - basic traffic laws, so not running red lights, especially not in busy intersections. (#23)  F Well, I guess my instructions would be: one, that even though a lot of the red lights and things don't make sense and sometimes it's even better to go - unfortunately, if something does happen, you haven't got a leg to stand on. Maybe even literally…..  [Intersections] Ha ha ha Choke. Try to go when pedestrians are also going, or other bicycle riders, because I think that there's a certain safety in numbers, and the more likely to get the drivers' attention. And, don't dash out into them, because you don't know what's coming. [ Traffic signs and signals] They're there for a reason, and they keep things under control - if everybody does their part, then they usually work. (#24)  M Traffic signs and signals - Not quite sure how to answer that, but I would say, follow their instructions. (#5)  M I do, though, like, stop at lights almost all the time. There are occasions when I don't, but for the most part, I feel like, by observing those kind of general rules that it makes it easy to convince people that it's more predictable for other people, and it makes it more predictable for you, you know?.....  [Intersections] I think, stop and look, and, you know, proceed with caution. [Traffic signs and signals] I think you should stop, for the most part, at this point. (#7)  M Stop at the red lights, stop at the red lights, and stop at the red lights. That goes for stop signs as well, just - Even if you're going to go through it, at least give yourself enough time to react if you have to, but I've definitely seen some things where people do not obey the traffic signals and they - I mean, that's super dangerous. (#20)  F [Traffic signs and signals] Follow them? Follow them, like, within reason, you know? Like, if there’s no one there – I guess that’s not super-safe, but – okay, maybe I won’t say that as my advice. Don’t follow them. Yeah, like, follow them to the best of your ability. Like, they only – they only work if, like, everyone follows them. Even if it’s, like, a kind of lame thing to do as a biker, because, like, yeah, I see most people, they don’t really follow the stoplights or anything, but, like, it only works, kind of, as a system, and, like, that includes, you know, bikers, motorists, and pedestrians. Like, if everyone’s just doing what they want, then, like, it doesn’t – like, it can’t function. (#17) | |
