# Supplementary material for: Safety-oriented Practices of Adult Bicycle Ridersin Brooklyn, New York USA: An Interview Study
Source: Preprints.org preprint supplement (doi:10.20944/preprints202002.0159.v1), 2020-02-12
Supplement: Supplementary file 43 [file S36 Theme Respect.docx]

**Theme: Respect**

| **Sub-theme: Respect other road users.** | **Respondents** |
| --- | --- |
| **14 (10M, 4F)** |
| **Responses:**  M Mutual, sharing respect, having - Give respect to others - you know - kindness and awareness. (#1)  M [Respect] I mean – Just respect people and respect the machines next to you. (#4)  M I think respect is the word. Respecting yourself, respecting people's space, respecting rules and regulations, and we don't have a lot of that, unfortunately. (#13)  M I mean, that's a big one for me, I guess. Just, you know respect everyone that's out on the road, everyone has somewhere to go just like yourself and, you know, if you, I feel like as a cyclist, if you are gracious towards cars, that, you know, they'll look out for you or other cyclists in the future, and, instead of, you know - I've seen cyclists, like, smack car doors and things like that, and that really irritates me, because it's - that's not helping anyone, that's just, you know, creating a culture of drivers that hate cyclists. (#15)  M So, maybe the other thing is, be considerate, right? (#18)  M I am of the opinion that I'm very vulnerable, and I should show as much respect to cars disrespecting cars is something that I've had issues with other cyclists whose behavior is quite aggressive. And as I say, I wouldn't pick a fight with a car, and I don't want cyclists to be deemed to be disrespectful, aggressive, or irresponsible, and I think that's how they're perceived by a lot of people because of disrespect. So I think it's important to know when you have when it's your light, or it's their light, and respect those rules. (#19)  M Respect your pedestrians, your cars, and the rules of the road. And your fellow bikers. Respect all. (#21)  F As much as it's frustrating to be a cyclist, because if you feel like people don't necessarily consider you or respect you, it's important to have that reciprocity, so, you know, you do the same thing for pedestrians and cars as well. (#22)  M The main thing is that you've got to have just a level of respect for everybody that's out on the road - that's first and foremost to me I mean - I I don't - I don't feel it's necessary to impose your will or your agenda on anyone else. I think you could take care of your own business - I think you can take, you know - do what you need to do as a cyclist and not put anybody in, like, you know, a dangerous situation, or even an inconvenient - or a situation where they're just not happy with you. Yeah, respect for - respect for others really is my biggest thing. (#5)  F Well, there's a combination of respect and fear. As I say, if it's an SUV, I'll just hang behind - but yeah, I'm respectful of people. (#6)  M I think, yeah, respect for all the other participants that are sharing the road….. All of the participants have a sense of entitlement, which is a little crazy, like, but, you know - cyclists as well as car drivers and pedestrians, and so everybody thinks that they should be the one who gets to do what they want….. so it's like everything else in the City where you have a lot of people and you have to negotiate - it's challenging. (#7)  F Obviously - everyone should use a bit of respect while biking and driving. (#8)  M I believe that respect for the road is as - go as far as how safe you want to be. I think you respect vehicles on the same road, sharing the same road with you, then you can hope to gain that type of respect; if you cut a vehicle off, don't expect that vehicle not to do the same to you. (#20)  F We all need to respect each other - we're all trying to get places, we all have the right to use sidewalks, the roads, streets, crosswalks. And drivers need to respect pedestrians' and bicycle riders' rights to use the - you know, to use the streets. They're not just there for them. (#24) | |

| **Sub-theme: Bicycle riders and bicycle lanes don’t get enough respect.** | **Respondents** |
| --- | --- |
| **8 (1M, 7F)** |
| **Responses:**  F Respect the bike lane - it just doesn't happen very often. That - That's what that word makes me think of, is the lack of respect that people show to the bike lane. (#10)  F I think that no one respects bikers, and they get a bad rap. (#11)  F I think people should respect cyclists and their - give them more space on the road. They deserve just as much amount of space while cycling on the road, so move over or please share a lane. I don't know what's so hard about that. (#16)  F I wish people had more. It also sucks being, like, a female bike rider and being, like, cat-called and followed while you're on your bike. Like, that's happened to me lots of times, and, like, I don't know, they just, like - there was one time, like, this car followed me, like, it kept on following me every intersection, and then he said, like, these nasty things to me, and I'm, like, fuck it, I'm just going to go into the intersection so this car won't follow me anymore. Yeah, I feel like it's a whole other level of, like, disrespect to be, like, put in such a position of vulnerability where, like, someone's, you know, saying these things to you and also in a car, and if you, like, say anything back, they could, like, run you over. So, respect, I hope people have more of it. (#17)  F Respect you know, what I said about that, like: that people don't care. And yeah, I think that I get annoyed sometimes by that. I'm just, like - You can see that I am here, and, like, why are you pretending that I am not there? You know, it's just that - I think that is actually the thing that annoys me the most because sometimes they can put me and them in, like, dangerous situations just because they pretend that I'm not there. (#2)  M I don’t think cars and trucks respect bikers in the lane. I think that’s a big thing. (#4)  F This is a good one, because I feel like there is not much respect for our bike - you know, for riders and bike culture in New York - more and more, but - cars - there needs to be more respect, especially for the infrastructure and bike lanes so we can bike safer. (#23)  F Try to be a good ambassador, because a lot of drivers justify their bad behavior - I mean, it's stupid and it sort of smacks of victim blame, but nonetheless, a lot of drivers use bike riders' bad behavior as an excuse for hitting us, for doing stupid things, and for not respecting our presence on the road. So the more - I feel very strongly that the more riders who are out there that do ride their bikes responsibly and follow traffic laws, the better we can get support for our - be - for our presence. And hopefully also, stay out of trouble. (#24) | |
