# Supplementary material for: Safety-oriented Practices of Adult Bicycle Ridersin Brooklyn, New York USA: An Interview Study
Source: Preprints.org preprint supplement (doi:10.20944/preprints202002.0159.v1), 2020-02-12
Supplement: Supplementary file 45 [file S37 Theme Helmet use.docx]

| **Theme: Wear a bike helmet when riding.** | **Respondents** |
| --- | --- |
| **11 (3M, 8F)** |
| **Responses:**  F Wear a helmet. (#10)  F Be sure to wear a helmet every time you go on a bike ride, even if you're on, like, a greenway. (#11)  F Not wearing a helmet. I just don't understand. Yeah, that's, like, a number one priority not riding wearing a helmet. (#16)  F Wear a helmet. (#17)  F Wear your helmet, of course. (#22)  F Helmet use. (#23)  F I go slow, and I always wear a helmet. (#6)  F Do use a helmet. (#8)  M Wear your helmet. (#13)  M I'm wearing a helmet. (#21)  M Always wear a helmet. (#20) | |
